# Supplementary material for: Conserved BK Channel-Protein Interactions Reveal Signals Relevant to Cell Death and Survival
Source: PLoS One. 2011 Dec 9;6(12):e28532. doi: 10.1371/journal.pone.0028532 (PMC3235137; doi:10.1371/journal.pone.0028532)
Supplement: Table S4 — Primary BKAPs, from membrane/cytoskeletal and cytoplasmic fractions, categorized according to organelle location, ion channel association, and cellular process. (XLS) [file pone.0028532.s005.xls]

## Sheet: Membrane
Table S4A. Primary BKAPs, from membrane/cytoskeletal fraction, categorized according to organelle location, ion channel association, and cellular process.
	Membrane/cytoskeletal BKAPs
Spot Number	Name	Organelle	Ion Channel Association	Process
41	14-3-3 protein beta/alpha	Golgi	Cav2.2 channel	Signal transduction
21	14-3-3 protein epsilon	Golgi	Cav2.2 channel	Signal transduction
26	14-3-3 protein gamma	Golgi	Cav2.2 channel	Signal transduction
40	14-3-3 protein theta	Golgi	Cav2.2 channel	Signal transduction
10	60 kDa heat shock protein, mitochondrial precursor	Mitochondrial matrix	Ca channel, L-type	Trafficking/Scaffolding
4	78 kDa glucose-regulated protein precursor	ER	VDAC	Trafficking/Scaffolding
58	Aconitate hydratase, mitochondrial precursor	Mitochondria	New	Metabolism
14	Alpha actin	Cytoskeleton	TRP Channel	Signal transduction
19	Annexin A5	ER	Ca channel	Signal transduction
30	Apolipoprotein AI precursor	Membrane Secretion	Ca channel, L-type	Signal transduction
15	Aspartate aminotransferase	Cytoplasm/Mitochondria	New	Metabolism
13	ATP synthase subunit beta, mitochondrial precursor	Mitochondria	Ca2+ channel	Metabolism
16	Beta-tectorin precursor	Membrane		Development
70	Calcium activated potassium channel	Membrane	BK channel
29	Calcium-binding protein p22 / Calcineurin B	Membrane	Ca Channel L-type	Development
42	Calretinin	ER lumen	TRPC1	Trafficking/Scaffolding
68	Cold-inducible RNA-binding protein	Membrane	New	Translational/Transcription
23	Collagen alpha-1(II) chain precursor	Membrane	TRP Channel	Trafficking/Scaffolding
17	COP9 signalosome complex subunit 4	Nucleus	CaV channel	Signal transduction
67	Destrin	Cytoskeleton	Cl Channel	Trafficking/Scaffolding
60	Elongation factor 1-alpha, somatic form	Ribosome	Ca Channel	Translation
45	Endoplasmic reticulum protein ERp29	ER	New	Translation
57	Endoplasmin precursor	ER	New	Protein Folding
22	F-actin-capping protein subunit alpha-2	Cytoskeleton	BK Channel	Trafficking/Scaffolding
59	Fumarate hydratase, mitochondrial precursor	Mitochondria	New	Metabolism
61	Gelsolin precursor	Cytoskeleton	VDAC	Trafficking/Scaffolding
56	Golgin subfamily A member 2	Golgi	K Channel	Transport
18	Guanine nucleotide binding protein G(I)/G(S)/G(T) subunit beta 1	Membrane	TRP Channel	Signal transduction
6	Heat shock 70 kDa protein	Mitochondrial matrix	Na channel	Trafficking/Scaffolding
7	Heat shock cognate 71 kDa protein	ER	Na channel	Trafficking/Scaffolding
35	Heat shock protein beta-1	ER	New	Trafficking/Scaffolding
3	Heat shock protein HSP 90-alpha	ER	K Channel	Trafficking/Scaffolding
31	Heme binding protein 1	Membrane	BK Channel	Metabolism
47	Hemoglobin subunit alpha-D	Cytoplasm	Chloride channel	Transport
64	Heterogeneous nuclear ribonucleo-proteins A2/B1	Cytoplasm	New	Development/Differentiation
52	Hippocalcin-like protein 1	Golgi Membrane	BK channel	Signaling
44	Hydroxymethylglutaryl CoA lyase	Peroxisome	New	Metabolism
69	Isocitrate dehydrogenase	Mitochondrial membrane	K Channel/ATP- sensitive	Metabolism
49	Lactoylglutathione lyase	Membrane	New	Metabolism
67	Lin-7 homolog C	Secreted	Kv channel/IR	Trafficking/Scaffolding
36	Mesoderm development candidate 2	Membrane	Ca Channel	Signal transduction
71	Myelin basic protein	Membrane	BK channel	Development/Differentiation
27	Myelin P0 protein precursor	Membrane	Kv channel	Development/Differentiation
32	NADH dehydrogenase [ubiquinone] flavoprotein 2, mitochondrial precursor	Mitochondria	VDAC	Transport
53	Neurocalcin-delta	Membrane		Signal transduction
8	Neurofilament light polypeptide	Membrane	TRPC	Trafficking /Scaffolding
5	Neurofilament medium polypeptide	Membrane	TRPC	Trafficking /Scaffolding
51	Peptidyl prolyl cis-trans isomerase A	Membrane	TRP Channel	Protein folding
55	Profilin-2	Cytoskeleton	New	Signal transduction
37	Programmed cell death protein 10	Membrane	New	Signal transduction
38	Prohibitin	Mitochondrial membrane	VDAC	Development / Differentiation
39	Protein C14orf166 homolog	Nucleus	New	Transcription / Translational
25	Serine/threonine protein phosphatase	Membrane	K channel	Phosphorylation
62	Serpin H1 precursor / Plasminogen activator inhibitor 1	Secreted	New	Metabolism
63	Ski-like protein	Golgi	New	Signal transduction
65	Slit homolog 3 protein precursor	Membrane	Na Channel	Metabolism
1	Sodium/potassium-transporting ATPase subunit alpha-1 precursor	Membrane	Na channel	Transport
24	STIP1 homology and U box-containing protein 1	Golgi	New	Protein Folding
9	Stress-induced-phospho-protein 1	Nucleus	K channel	Trafficking/Scaffolding
48	Superoxide dismutase [Mn], mitochondrial precursor	Mitochodria	BK Channel	Metabolism
28	Synaptosomal associated protein 25	Membrane	CaV channel	Trafficking / Scaffolding
33	Transforming protein RhoA precursor	Membrane	Na Channel	Signal transduction
72	Translational endoplasmic reticulum ATPase	ER	Ca Channel	Translational
2	Tubulin alpha chain	Cytoskeleton/Microtubule	Ca channel/L-type	Trafficking / Scaffolding
11	Tubulin beta chain	Cytoskeleton/Microtubule	Ca channel/L-type	Trafficking / Scaffolding
34	Vacuolar protein sorting associated protein 28 homolog	Endosome	New	Transport
50	Vesicle associated membrane protein 2	Membrane	Kv Channel	Trafficking / Scaffolding
12	ATP synthase subunit beta, mitochondrial precursor	Mitochondrial membrane	New	Metabolism
54	Visinin like protein 1	Membrane	CaV Channel	Signal Transduction
43	Voltage-dependent anion-selective channel protein 1	Mitochontrial Outer Membrane	VDAC	Trafficking / Scaffolding
46	Voltage-dependent anion-selective channel protein 2	Mitochontrial Outer Membrane	VDAC	Trafficking / Scaffolding
66	Zinc finger CCCH domain containing protein 13	Membrane	New	Translational

## Sheet: Cytoplasmic
Table S4B. Primary BKAPs, from cytoplasmic fraction, categorized according to organelle location, ion channel association, and cellular process.
	Cytoplasmic BKAPs
Spot Number	Name	Organelle	Ion Channel Association	Process
19	14-3-3 protein epsilon	Golgi	Cav2.2 channel	Signal transduction
16	14-3-3 protein eta	Golgi	Cav2 channel	Signal transduction
21	14-3-3 protein zeta	Golgi	Cav2 channel	Signal transduction
18	40S ribosomal protein SA	Ribosome	New	Translation/Transcription
8	Actin, cytoplasmic 2 / Gamma actin	Cytoskeleton	BK channel	Trafficking/Scaffolding
27	ADP-ribosylation factor 1	Golgi	BK channel	Signal transduction
33	Alcohol dehydrogenase [NADP+]	Cytoplasm	Cav2 channel	Metabolism
11	Aldehyde dehydrogenase, mitochondrial	Mitochondrial matrix	New	Metabolism
49	Aspartate aminotransferase, mitochondrial precursor	Cytoplasm/Mitochondria	New	Metabolism
12	ATP synthase subunit alpha heart isoform, mitochondrial precursor	Mitochondrial matrix	New	Metabolism
17	Calbindin	Cytoplasm	Kv channel	Transport
25	Calmodulin-Neo	Cytoplasm	Cav2 channel	Signaling
37	Calretinin	Cytoplasm	TRPC1	Trafficking/Scaffolding
23	Cathepsin B precursor	Lysozyme	New	Metabolism
14	Charged multivesicular body protein 4b	Cytoplasm	New	Transport
4	Coatomer subunit delta	Golgi	KV channel	Transport
35	Cochlin precursor	Cytoplasm/ Mitochondrial matrix	New	Development
2	Collagen alpha-1(II) chain precursor	Cytoplasm	TRP Channel	Signaling
10	Creatine kinase B-type	Cytoplasm	K Channel/ATP sensitive	Metabolism
3	Dihydropyrimidinase related protein 2 / Collapsin response mediator protein 1	Cytoplasm	CaV channel	Signal transduction
7	Dynactin subunit 2	Microtubule	KV channel	Trafficking/Scaffolding
9	Enolase - Alpha	Cytoplasm	K Channel	Development/Differentiation
51	Fructose bisphosphate aldolase B	Cytoplasm	New	Metabolism
6	Gamma-enolase	Cytoplasm	K Channel	Metabolism
41	Glia maturation factor beta	Cytoplasm	New	Development / Differentiation
36	Glutamine synthetase	Cytoplasm	New	Metabolism
48	Glyceraldehyde-3-phosphate dehydrogenase	Mitochondria	Ca channel	Metabolism
38	Hemoglobin subunit beta	Cytoplasm	Chloride channel	Transport
54	Lamin-A/C	Nucleus	K channel	Development/Differentiation
53	Lamin-B2	Nucleus	Ca channel/L-type	Development/Differentiation
32	L-lactate dehydrogenase A chain	Mitochondrial Matrix	K channel/ATP Sensitive	Metabolism
47	L-lactate dehydrogenase B chain	Mitochondrial Matrix	K channel/ATP Sensitive	Metabolism
13	Malate dehydrogenase, cytoplasmic	Mitochondria	Nucleic acid channel	Metabolism
24	Myosin light polypeptide 6	Cytoplasm	TRPC	Development/Differentiation
22	Myosin regulatory light chain 2-A	Cytoplasm	New	Metabolism
34	Vimentin	Cytoplasm	New	Metabolism
43	Nucleoside diphosphate kinase	Nucleoplasm	BK Channel	Signal Transduction / Phosphorylation
1	Ovotransferrin precursor	Secreted	New	Metabolism
39	Parvalbumin, muscle	Cytoplasm	CaV channel	Development/Differentiation
31	Peroxiredoxin-6	Mitochondrial matrix/Cytoplasm	K channel/SK	Signaling
50	Phosphoglycerate kinase	Cytoplasm	Chloride channel	Metabolism
30	Phosphoglycerate mutase 1	Cytoplasm	New	Metabolism
45	Proteasome subunit alpha type 7	Endoplasmic reticulum	Na channel	Metabolism
52	Pyruvate kinase muscle isozyme	Endoplasmic reticulum	K ATP Channel	Metabolism
42	Ras-related protein Rab-18	Endosome	Na channel	Signal Transduction
15	Serine/threonine protein phosphatase 2A catalytic subunit alpha isoform	Cytoplasm	K Channel	Phosphorylation
5	Serum albumin precursor	Secreted	BK channel	Metabolism
28	Stathmin	Cytoskeleton/microtubule	TRP Channel	Development/Differentiation
26	Superoxide dismutase [Cu-Zn]	Mitochondrial matrix	BK channel	Metabolism
40	Synuclein Alpha	Nucleus	CaV channel	Trafficking / Scaffolding
44	Thy-1 membrane glycoprotein precursor	Nucleus	CaV channel	Development / Differentiation
29	Triosephosphate isomerase	Cytoplasm	K Channel/ATP sensitive	Metabolism
20	Tropomyosin alpha-3 chain	Cytoplasm	Ca channel, L-type	Development/Differentiation
