# Supplementary material for: Conserved BK Channel-Protein Interactions Reveal Signals Relevant to Cell Death and Survival
Source: PLoS One. 2011 Dec 9;6(12):e28532. doi: 10.1371/journal.pone.0028532 (PMC3235137; doi:10.1371/journal.pone.0028532)
Supplement: Table S5 — UniProt IDs of primary and secondary partners with their corresponding KOG_IDs common to mouse alone, chick alone, and mouse and chick together. (XLS) [file pone.0028532.s006.xls]

## Sheet: MOUSE ALONE
Table S5A. UniProt IDs of primary and secondary BKAPs with their corresponding KOG IDs common to mouse.
UniProt-IDs		KOG-IDs
Protein A	Protein B	Protein A	Protein B	Protein A Name	Protein B Name
P14206	P63260	KOG0830	KOG0676	TACSTD1	Gamma actin
P14206	P68134	KOG0830	KOG0676	TACSTD1	Calrecticulin
P16627	P68134	KOG0101	KOG0676	HSP 70	Calrecticulin
P16627	Q01105	KOG0101	KOG1508	HSP 70	Protein SET
P40142	Q8R317-2	KOG0523	KOG0010	Transketolase	Ubiquilin-1
P60710	P35438	KOG0676	KOG0773	Actin cytoplasmic	NMDA Receptor
P60710	P62158	KOG0676	KOG1508	Actin cytoplasmic	Calmodulin
P60710	Q01097	KOG0676	KOG0027	Actin cytoplasmic	NMDA Receptor epsilon 2
P63101	P62158	KOG0841	KOG0027	14-3-3 Zeta	Calmodulin
P63260	P09103	KOG0676	KOG0190	Gamma actin	Protein disulphide isomerase
P63260	P14206	KOG0676	KOG0676	Gamma actin	Lamin
P63260	P14211	KOG0676	KOG0830	Gamma actin	Alpha actin skeleton muscle
P63260	P14206	KOG0676	KOG0676	Gamma actin	Lamin
P63260	P14211	KOG0676	KOG0830	Gamma actin	Alpha actin skeleton muscle
P68134	P16627	KOG0676	KOG0101	Calrecticulin	HSP 70
P68134	P62082	KOG0676	KOG3320	Calrecticulin	Ubiquitin conjugating enzyme
P68134	Q5J9A9	KOG0676	KOG0211	Calrecticulin	TPP complex 2
P68134	Q8VDN2	KOG0676	KOG0279	Calrecticulin	Na/K transporting ATPase subunit
P68366	P30050	KOG1376	KOG2670	Alpha tubulin	60S ribosomal protein L12
P68366	P30408	KOG1376	KOG0886	Alpha tubulin	TM 4 L6 family member 1
P80314	Q01105	KOG0363	KOG1508	TCP-1-beta	Protein SET
P80314	Q9EQU5	KOG0363	KOG1508	TCP-1-beta	Protein SET
Q61171	Q8R317-2	KOG0852	KOG0010	Peroxidase	Ubiquilin-1
Q9QUI0	P63001	KOG0393	KOG0393	Rho-a	Rac 1
P83917	P68433	KOG1911	KOG1745	Chromobox Homolog	Histone H3.1
P83917	P35991	KOG1911	KOG2177	Chromobox Homolog	Tyrosine-protein kinase
P83917	P83917	KOG1911	KOG2177	Chromobox Homolog	Chromobox Homolog
P83917	Q64127	KOG1911	KOG2177	Chromobox Homolog	TIF1-alpha
P51863	Q01097	KOG2957	KOG1053	Vacular proton pump D1	NMDA Receptor epsilon 2
P51863	Q01097	KOG2957	KOG1053	Vacular proton pump D1	NMDA Receptor epsilon 2
P60710	P07141	KOG0676	KOG4440	Actin cytoplasmic	Macrophage colony-stimulating factor 1
P60710	P55347	KOG0676	KOG1053	Actin cytoplasmic	Homeobox protein PKNOX1
P62259	P35438	KOG0841	KOG4440	14-3-3 epsilon	NMDA Receptor
P63101	O54737	KOG0841	KOG4049	14-3-3 Zeta	BCA protein
P63101	Q01097	KOG0841	KOG1053	14-3-3 Zeta	NMDA Receptor epsilon 2
P63260	P97429	KOG0676	KOG3587	Gamma actin	Disulphide isomerase
P68134	P26040	KOG0676	KOG3529	Calrecticulin	Cytovilin 2
P68134	Q61512	KOG0676	KOG0203	Calrecticulin	TACSTD1
P68134	Q63880	KOG0676	KOG4119	Calrecticulin	Esterase 31
P63260	Q8K419	KOG0676	KOG3555	Gamma actin	Galectin-4
P60710	P97429	KOG0676	KOG3882	Actin cytoplasmic	Disulphide isomerase
P68366	P04899	KOG1376	KOG2483	Alpha tubulin	GNBPA2
P68366	P01106	KOG1376	KOG2200	Alpha tubulin	c-Myc
P68366	P04899	KOG1376	KOG1025	Alpha tubulin	GNBPA2
P68366	P30050	KOG1376	KOG0515	Alpha tubulin	60S ribosomal protein L12
P63101	Q01097	KOG0841	KOG1053	14-3-3 Zeta	NMDA Receptor epsilon 2
P99024	Q13873	KOG1375	KOG3653	Tubulin beta-5	BMPR II
Q61171	P01942	KOG0852	KOG1053	Peroxidase	Hemoglobin subunit alpha
P68366	P56945	KOG1376	KOG0035	Alpha tubulin	BCAR1
P83917	EBI-1013736	KOG1911	KOG1911	Chromobox Homolog
P02088	Q8R317-2	KOG3378	KOG0010	Haemoglobin B 1	Ubiquilin-1
P02089	Q8R317-2	KOG3378	KOG0010	GST	Ubiquilin-1
P18760	Q99P81	KOG1735	KOG0061	Cofilin-1	ATP-binding cassette G3
P56480	O89061	KOG1350	KOG0852	ATP synthetase B subunit	D-aminolevulinic acid
P56480	P02088	KOG1350	KOG3378	ATP synthetase B subunit	Haemoglobin B 1
P56480	Q01105	KOG1350	KOG1508	ATP synthetase B subunit	Protein SET
P56480	Q60817	KOG1350	KOG2239	ATP synthetase B subunit	NAC
P60710	Q3V0K9	KOG0676	KOG1181	Actin cytoplasmic	plastin 1
P60710	Q3V0K9	KOG0676	KOG0046	Actin cytoplasmic	plastin 1
P63260	O55022	KOG0676	KOG1110	Gamma actin	Memb asso progesterone receptor
P63260	O55022	KOG0676	KOG1110	Actin cytoplasmic 2	Memb asso progesterone receptor
P68134	Q8R3G9	KOG0676	KOG3487	Calrecticulin	Tetraspanin-8
P68366	P05109	KOG1376	KOG0082	Alpha tubulin	S100-A8
Q61171	P05201	KOG0852	KOG1350	Peroxidase	Aspertate aminotransferase
Q61171	P56480	KOG0852	KOG3378	Peroxidase	ATP synthetase B subunit
Q99KD7	P56480	KOG0101	KOG1350	HSPD 2	ATP synthetase B subunit
Q9CQV8	Q60597	KOG0841	KOG0450	14-3-3 beta	A-ketoglutarate dehydrogenase
P06151	EBI-1040965	KOG1495	KOG0118	lactate dehydrogenase A
P05064	Q9Z2A0	KOG1557	KOG0592	Fructase aldolase diphosphate	3 phosphoinositide dependent protein kinase
P14211	P63260	KOG0674	KOG0676	Alpha actin skeleton muscle	Gamma actin
P14211	P68134	KOG0674	KOG0676	Alpha actin skeleton muscle	Calrecticulin
P56480	O08807	KOG1350	KOG2332	ATP synthetase B subunit	Peroxiredoxin-4
P60710	Q01105	KOG0676	KOG0819	Actin cytoplasmic	Protein SET
P63260	P14211	KOG0676	KOG0819	Gamma actin	Alpha actin skeleton muscle
P63260	Q8K419	KOG0676	KOG0674	Gamma actin	Galectin-4
P63260	Q8QZR3	KOG0676	KOG1516	Gamma actin	Carboxylesterase 6
P68134	P63260	KOG0676	KOG0819	Calrecticulin	Gamma actin
P60710	Q01105	KOG0676	KOG0819	Actin cytoplasmic	Protein SET
P63260	Q8QZR3	KOG0676	KOG1516	Gamma actin	Carboxylesterase 6
P68134	Q5NCC5	KOG0676	KOG1422	Calrecticulin	GNB 2l 1
P63260	P97429	KOG0676	KOG0819	Gamma Actin	Annexin A4
P63260	Q8K419	KOG0676	KOG0674	Gamma actin	Galectin-4
P68366	Q6IA98	KOG1376	KOG0147	Alpha tubulin	RNPC4
P02088	P56480	KOG3378	KOG1350	Haemoglobin B 1	ATP synthetase B subunit
P02089	P05201	KOG3378	KOG3378	GST	Aspertate aminotransferase
P02089	P01942	KOG3378	KOG3378	GST	Hemoglobin subunit alpha
P56480	P02088	KOG1350	KOG3378	ATP synthetase B subunit	Haemoglobin B 1
Q60864	P56480	KOG0548	KOG1350	Stress induced phosphoprotein	ATP synthetase B subunit
Q9CQA3	P16054	KOG3049	KOG0449	Succinate dehydrogenase	Protein kinase
Q9CZ13	Q9D0M3	KOG0960	KOG3052	Cytochrome b-c1	Cytochrome c1
Q9D6R2	P70404	KOG0785	KOG0784	isocitrate dehydrogenase	Isocitric dehydrogenase
Q9D6R2	Q91VA7	KOG0785	KOG0784	isocitrate dehydrogenase	Tumor-related protein
O88712	Q6P1G2	KOG0067	KOG1947	C terminal binding protein1	F-box LRR repeat protein
P68366	Q6IA98	KOG1376	KOG4562	Alpha tubulin	RNPC4
P56480	P29391	KOG1350	KOG2794	ATP synthetase B subunit	Ferritin L chain 1
P83917	Q13263	KOG1911	KOG4364	Chromobox Homolog	TIF1-beta
P14211	P70196	KOG0674	KOG0297	Alpha actin skeleton muscle	TNF-AF 6
P83917	Q62318	KOG1911	KOG0197	Chromobox Homolog	TIF1-beta
P05201	P35700	KOG1412	KOG0852	Aspertate aminotransferase	Peroxiredoxin
P05201	P15532	KOG1412	KOG0888	Aspertate aminotransferase	Nucleoside diphosphate kinase A
P05201	Q61171	KOG1412	KOG0852	Aspertate aminotransferase	Peroxidase
P05201	P45376	KOG1412	KOG1577	Aspertate aminotransferase	Aldolase reductase
P05201	P61089	KOG1412	KOG0417	Aspertate aminotransferase	Ubiquitin conjugating enzyme
P05201	P62991	KOG1412	KOG0001	Aspertate aminotransferase	Ubiquitin
P05201	Q61171	KOG1412	KOG0852	Aspertate aminotransferase	Peroxidase
P05201	Q99J77	KOG1412	KOG0852	Aspertate aminotransferase	N acetyl neuraminic acid synthase
P68366	P62993	KOG1376	KOG3601	Alpha tubulin	GFR-bound protein 2
Q61171	P01942	KOG0852	KOG1412	Peroxidase	Hemoglobin subunit alpha
Q9D051	P16054	KOG0524	KOG0694	Pyruvate dehydrogenase 1	Protein kinase
P02088	P01942	KOG3378	KOG1412	Haemoglobin B 1	Haemoglobin subunit
P02089	P04224	KOG3378	KOG1412	GST	H2 class II histocampatibility antigen
P05201	P02088	KOG1412	KOG3378	Aspertate aminotransferase	Haemoglobin B 1
P05201	P02089	KOG1412	KOG3378	Aspertate aminotransferase	GST
P05201	P01942	KOG1412	KOG3378	Aspertate aminotransferase	P01942
P05201	Q9WTP7	KOG1412	KOG3078	Aspertate aminotransferase
Q03265	Q01097	KOG1353	KOG0694	ATP 5a1	NMDA Receptor epsilon 2
Q60932	Q01097	KOG3126	KOG0694	VDAC1	NMDA Receptor epsilon 2
Q9CQA3	Q9CZB0	KOG3049	KOG0694	Succinate dehydrogenase	Succinate dehydrogenase
Q9D6R2	P16054	KOG0785	KOG0694	isocitrate dehydrogenase	Protein kinase
P58771	Q8CBW3	KOG1003	KOG0694	Tryphomyosin alpha	Abelson interactor-1
O88712	Q8BX46	KOG0067	KOG3653	C terminal binding protein1	Ladybird homeobox corepressor 1
O88712	Q6P1G2	KOG0067	KOG3915	C terminal binding protein1	F-box LRR repeat protein
P06151	Q01097	KOG1495	KOG0904	lactate dehydrogenase A	NMDA Receptor epsilon 2
P06151	Q60668	KOG1495	KOG1053	lactate dehydrogenase A	HN-ribonucleoprotein D0
P07759	Q13873	KOG2392	KOG3653	Contrapsin	BMPR II
P14211	Q9Z279	KOG0674	KOG4226	Alpha actin skeleton muscle	Envelope glycoprotein
P06151	Q60668	KOG1495	KOG1053	lactate dehydrogenase A	HN-ribonucleoprotein D0
P05201	P00920	KOG1412	KOG0382	Aspertate aminotransferase	Carbonic anhydrase
P00920	P05201	KOG0382	KOG1412	Carbonic anhydrase	Aspertate aminotransferase
P05201	P14152	KOG1412	KOG1496	Aspertate aminotransferase	MDH
P58771	P16054	KOG1003	KOG2546	Tryphomyosin alpha	Protein kinase
Q03265	P16054	KOG1353	KOG1053	ATP 5a1	Protein kinase
Q60932	P16054	KOG3126	KOG1053	VDAC1	Protein kinase
P23927	P16054	KOG3591	KOG3667	Alpha-crystallin B	Protein kinase
P08553	Q01097	KOG0977	KOG1053	Neurofilament M	NMDA Receptor epsilon 2
P23927	Q13873	KOG3591	KOG3653	Alpha-crystallin B	BMPR II
P23927	Q8CIH5	KOG3591	KOG1264	Alpha-crystallin B	Phospholipase C, gamma 2
P23927	P42227	KOG3591	KOG0694	Alpha-crystallin B	Stat3
P05201	P55302	KOG1412	KOG3956	Aspertate aminotransferase	MRAP alpha 2
P61979	P16054	KOG2192	KOG0694	HN ribonucleoprotein K	Protein kinase

## Sheet: CHICK ALONE
Table S5B. UniProt IDs of primary and secondary BKAPs with their corresponding KOG IDs common to chick .
UniProt-IDs		KOG-IDs
Protein A	Protein B	Protein A	Protein B	Protein A Name	Protein B Name
P07901	P30561	KOG0019	KOG3560	Heat shock protein HSP 90-alpha	Aryl hydrocarbon receptor
P07901	Q61045	KOG0019	KOG3559	Heat shock protein HSP 90-alpha	Single-minded homolog 1
P16858	Q01097	KOG0657	KOG1053	Glyceraldehyde-3-phosphate dehydrogenase	NMDA Receptor
P20029	P12023	KOG0100	KOG3540	78 kDa glucose-regulated protein precursor	Amyloid beta A4 protein
P62204	P00533	KOG0027	KOG1025	Calmodulin - Neo	Epidermal growth factor receptor
P62204	P35438	KOG0027	KOG4440	Calmodulin - Neo	NMDA Receptor zeta-1
P62204	Q01097	KOG0027	KOG1053	Calmodulin - Neo	NMDA Receptor
P63101	Q01097	KOG0841	KOG1053	14-3-3 protein zeta	NMDA Receptor
P63101	Q9QWV4	KOG0841	KOG4049	14-3-3 protein zeta	Myeloid leukemia factor 1
P63260	Q8K419	KOG0676	KOG3587	Actin, cytoplasmic	Galectin-4
P68369	P23819	KOG1376	KOG1054	Tubulin alpha-1A chain	Glutamate receptor 2
P68369	P35991	KOG1376	KOG0197	Tubulin alpha-1A chain	Tyrosine-protein kinase
P68369	P35438	KOG1376	KOG4440	Tubulin alpha-1A chain	NMDA Receptor zeta-1
P68369	Q01097	KOG1376	KOG1053	Tubulin alpha-1A chain	NMDA Receptor
Q01768	O88351	KOG0888	KOG4250	Nucleoside diphosphate kinase B	Ikbkb
Q01768	P09055	KOG0888	KOG1226	Nucleoside diphosphate kinase B	Integrin beta-1
Q01768	P26450	KOG0888	KOG4637	Nucleoside diphosphate kinase B	Pik3r1
Q01768	Q80X16	KOG0888	KOG2243	Nucleoside diphosphate kinase B	Ryanodine receptor 1
Q01768	Q99N72	KOG0888	KOG4240	Nucleoside diphosphate kinase B	Mcf2 proto-oncogene protein
Q8VDN2	P68134	KOG0203	KOG0676	Na/K transporting ATPase subunit	Alpha actin skeletal muscle
P63260	Q8QZR3	KOG0676	KOG1516	Gamma Actin	Carboxylesterase 6
O08709	P47713	KOG0854	KOG1911	Peroxiredoxin-6	Cytosolic phospholipase A2
P63260	P97429	KOG0676	KOG0819	Gamma Actin	Annexin A4
P63260	P14211	KOG0676	KOG0674	Gamma Actin	Calrecticulin (Mouse)
Q01853	Q9CVD2	KOG0730	KOG2935	Transitional endoplasmic reticulum ATPase	Ataxin-3
P63260	O55022	KOG0676	KOG1110	Gamma Actin	Memb asso progesterone receptor
P47754	P62158	KOG0836	KOG0027	F-actin-capping protein alpha-2	Calmodulin (Human)
P63260	Q9Z2A0	KOG0676	KOG0592	Gamma Actin	3 phosphoinositide dependent protein kinase
Q01768	P47811	KOG0888	KOG0660	Nucleoside diphosphate kinase B	Mapk14
Q01853	Q9UNN5	KOG0730	KOG1363	Transitional endoplasmic reticulum ATPase	FAS-associated factor 1
Q01853	Q96CS3	KOG0730	KOG1363	Transitional endoplasmic reticulum ATPase	FAS-associated factor 2
Q01853	Q9BZE9	KOG0730	KOG2699	Transitional endoplasmic reticulum ATPase	Tether containing UBX domain for GLUT4
Q01853	P68543	KOG0730	KOG2086	Transitional endoplasmic reticulum ATPase	UBX domain-containing protein 2A
Q01853	Q9UNZ2	KOG0730	KOG2086	Transitional endoplasmic reticulum ATPase	p97 cofactor p47
Q9JJV2	P39053	KOG1755	KOG0446	Profilin-2	Dynamin-1
Q9R0P5	Q99P81	KOG1735	KOG0061	Destrin (Mouse)	ATP-binding cassette G3
P10126	Q01105	KOG0052	KOG1508	Elongation factor 1-alpha 1	Protein SET
O88569	Q01105	KOG0118	KOG1508	Heterogeneous nuclear ribonucleoproteins A2/B1	Protein SET
P10126	Q01105	KOG0052	KOG1508	Elongation factor 1-alpha 1	Protein SET
P10126	Q01534	KOG0052	KOG1508	Elongation factor 1-alpha 1	Testis-specific Y-encoded protein 1 (Human)
P63101	P62158	KOG0841	KOG0027	14-3-3 zeta/delta	Calmodulin (Human)
P63260	P14206	KOG0676	KOG0830	Gamma Actin	40S ribosomal protein SA
P63260	P09103	KOG0676	KOG0190	Gamma Actin	Protein disulphide isomerase
Q01853	Q9BUN8	KOG0730	KOG0858	Transitional endoplasmic reticulum ATPase	Derlin-1
Q01853	O94888	KOG0730	KOG1364	Transitional endoplasmic reticulum ATPase	UBX domain-containing protein 7
P16858	P16054	KOG0657	KOG0694	GAPDH	Protein kinase C epsilon
O88569	P16054	KOG0118	KOG0694	Heterogeneous nuclear ribonucleoproteins A2/B1	Protein kinase C epsilon
P17182	P16054	KOG2670	KOG0694	Alpha-enolase	Protein kinase C epsilon
P63044	P60766	KOG0860	KOG0393	Vesicle-associated membrane protein 2	Cdc42
Q01853	Q04323	KOG0730	KOG2689	Transitional endoplasmic reticulum ATPase	UBX domain-containing protein 1
P63044	O09044	KOG0860	KOG3065	Vesicle-associated membrane protein 2	SNAP-23
P47754	P16054	KOG0836	KOG0694	F-actin-capping protein alpha-2	Protein kinase C epsilon
Q60864	P56480	KOG0548	KOG1350	Stress induced phosphoprotein / HSP 90	ATP synthetase B subunit
P56480	Q9Z2A0	KOG1350	KOG0592	ATP synthetase B subunit	3 phosphoinositide dependent protein kinase
P05202	Q01097	KOG1411	KOG1053	Aspartate aminotransferase, mitochondrial	NMDA Receptor
O08709	Q01097	KOG0854	KOG1053	Peroxiredoxin-6	NMDA Receptor
P47754	Q01097	KOG0836	KOG1053	F-actin-capping protein alpha-2	NMDA Receptor
P60879	Q01097	KOG3065	KOG1053	Synaptosomal-associated protein 25	NMDA Receptor
Q60930	Q01097	KOG3126	KOG1053	VDAC-2	NMDA Receptor
P13020	Q8CIH5	KOG0443	KOG1264	Gelsolin	Phospholipase C, gamma 2
P08113	P12023	KOG0020	KOG3540	Heat shock protein 90 kDa beta member 1	Amyloid beta A4 protein
P13020	Q01097	KOG0443	KOG1053	Gelsolin	NMDA Receptor
Q9D6J6	Q01097	KOG3196	KOG1053	NADH dehydrogenase flavoprotein 2, mitochondria	NMDA Receptor
Q99KI0	Q01097	KOG0453	KOG1053	Aconitate hydratase, mitochondrial	NMDA Receptor
Q99KI0	P11881	KOG0453	KOG3533	Aconitate hydratase, mitochondrial	INS P3 receptor
Q60605	Q01097	KOG0030	KOG1053	Myosin light polypeptide 6	NMDA Receptor

## Sheet: MOUSE_CHICK
Table S5C. UniProt IDs of primary and secondary BKAPs with their corresponding KOG IDs common to mouse and chick .
UniProt-IDs		KOG-IDs
Protein A	Protein B	Protein A	Protein B	Protein A Name	Protein B Name
P61982	P35438	KOG0841	KOG4440	14-3-3 gamma	NMDA Receptor zeta-1
P17182	Q01097	KOG2670	KOG1053	Alpha-enolase	NMDA Receptor
P61982	Q01097	KOG0841	KOG1053	14-3-3 gamma	NMDA Receptor
P62259	P35438	KOG0841	KOG4440	14-3-3 epsilon	NMDA Receptor zeta-1
P61982	Q01097	KOG0841	KOG1053	14-3-3 gamma	NMDA Receptor
P62259	Q13671	KOG0841	KOG2320	14-3-3 epsilon	Ras & Rab interactor 1
Q01853	Q9ES00	KOG0730	KOG2243	Transitional endoplasmic reticulum ATPase	Ubiquitin conjugation factor E4B
P17751	Q01097	KOG1643	KOG1053	Triosephosphate isomerase	NMDA Receptor
P68510	Q01097	KOG0841	KOG1053	14-3-3 eta	NMDA Receptor
P48036	P62991	KOG0027	KOG1053	Annexin A5	Ubiquitin
P56480	P29391	KOG1350	KOG2332	ATP synthetase B subunit	Ferritin L chain 1
P48036	Q9CQW5	KOG0819	KOG0001	Annexin A5	Galectin-2
P20029	Q01105	KOG0100	KOG1508	78 kDa Glucose regulated protein	Protein SET
P27773	P97429	KOG0190	KOG0819	Protein disulfide-isomerase A3	Annexin A4
P56480	P29391	KOG1350	KOG2332	ATP synthetase B subunit	Ferritin L chain 1
P61982	Q9P0K1-3	KOG0841	KOG3607	14-3-3 gamma	ADAM22
P56480	P35700	KOG1350	KOG0852	ATP synthetase B subunit	Peroxiredoxin-1
P56480	Q61171	KOG1350	KOG0852	ATP synthetase B subunit	Peroxiredoxin 2
P56480	O08807	KOG1350	KOG0852	ATP synthetase B subunit	Peroxiredoxin-4
P56480	P09103	KOG1350	KOG0190	ATP synthetase B subunit	Protein disulphide isomerase
P56480	Q01105	KOG1350	KOG1508	ATP synthetase B subunit	Protein SET
P56480	Q60817	KOG1350	KOG2239	ATP synthetase B subunit	NAC
P56480	Q60864	KOG1350	KOG0100	ATP synthetase B subunit	Stress induced phosphoprotein / HSP 90
P56480	Q60864	KOG1350	KOG0103	ATP synthetase B subunit	Stress induced phosphoprotein / HSP 90
P20029	Q01105	KOG0100	KOG1508	78 kDa Glucose regulated protein	Protein SET
P17182	Q01105	KOG2670	KOG1508	Alpha-enolase	Protein SET
P20029	Q01105	KOG0100	KOG1508	78 kDa Glucose regulated protein	Protein SET
Q01853	Q9ES00	KOG0730	KOG2042	Transitional endoplasmic reticulum ATPase	Ubiquitin conjugation factor E4B
Q01853	P97449	KOG0730	KOG1046	Transitional endoplasmic reticulum ATPase	Aminopeptidase N
P56480	Q60864	KOG1350	KOG0548	ATP synthetase B subunit	Stress induced phosphoprotein / HSP 90
P56480	P02088	KOG1350	KOG3378	ATP synthetase B subunit	Haemoglobin B
P56480	Q99PT1	KOG1350	KOG3205	ATP synthetase B subunit	RHO GDP disassociation factor 1
O08553	P62158	KOG2584	KOG0028	Dihydropyrimidinase-related protein 2	Calmodulin (Human)
P63017	Q01105	KOG1350	KOG2794	Heat shock cognate 71 kDa	Protein SET
P63017	P35569	KOG1350	KOG0696	Heat shock cognate 71 kDa	Insulin receptor substrate 1
O88952	P62158	KOG3550	KOG0028	Lin-7 homolog C	Calmodulin (Human)
O88952	Q9CQJ4	KOG0356	KOG0696	Lin-7 homolog C	E3 ubiquitin-protein ligase RING2
O08553	Q01097	KOG2584	KOG1053	Dihydropyrimidinase-related protein 2	NMDA Receptor
P48036	Q9CQW5	KOG0819	KOG3587	Annexin A5	Galectin-2
O88952	O95477	KOG3550	KOG0059	Lin-7 homolog C	ATP-binding cassette A member 1
Q01853	P97449	KOG4364	KOG4743	Transitional endoplasmic reticulum ATPase	Aminopeptidase N
P20152	Q01097	KOG0977	KOG1053	Vimentin	NMDA Receptor
P20152	O54918	KOG0977	KOG1053	Vimentin	Bcl2-like protein
P20152	Q9R269	KOG0977	KOG0516	Vimentin	Periplakin
P20152	Q01105	KOG0977	KOG0696	Vimentin	Protein SET
P20152	Q8BWG8	KOG0977	KOG3865	Vimentin	Beta arrestin-1
P20152	P16054	KOG0977	KOG0785	Vimentin	Protein kinase C epsilon
P20152	P35465	KOG0977	KOG0578	Vimentin	Ser/thre-protein kinase PAK1
